# Supplementary material for: Erythromycin Modification That Improves Its Acidic Stability while Optimizing It for Local Drug Delivery
Source: PubMed Central journal article supplement (PMC5485444; doi:10.3390/antibiotics6020011), 2017-04-25
Supplement: antibiotics-06-00011-s001.pdf [file antibiotics-06-00011-s001.pdf]

# Supplementary Materials: Erythromycin Modification that Improves Its Acidic Stability While Optimizing It for Local Drug Delivery

Erika L. Cyphert, Jacqueline D. Wallat, Jonathan K. Pokorski and Horst A. von Recum

**Table S1.** Hydrophilic-Lipophilic Balance calculations for AD, EM, and AD-EM using three different calculation methods.

| Method   | AD    | EM    | AD-EM |
|----------|-------|-------|-------|
| ChemAxon | 10.68 | 15.26 | 13.19 |
| Davies   | 13.75 | 18.18 | 15.53 |
| Griffin  | 6.08  | 10.88 | 9.68  |

Note: Values determined using MarvinSketch Version 16.10.31 software (ChemAxon, 2016), HLB Predictor plug-in.

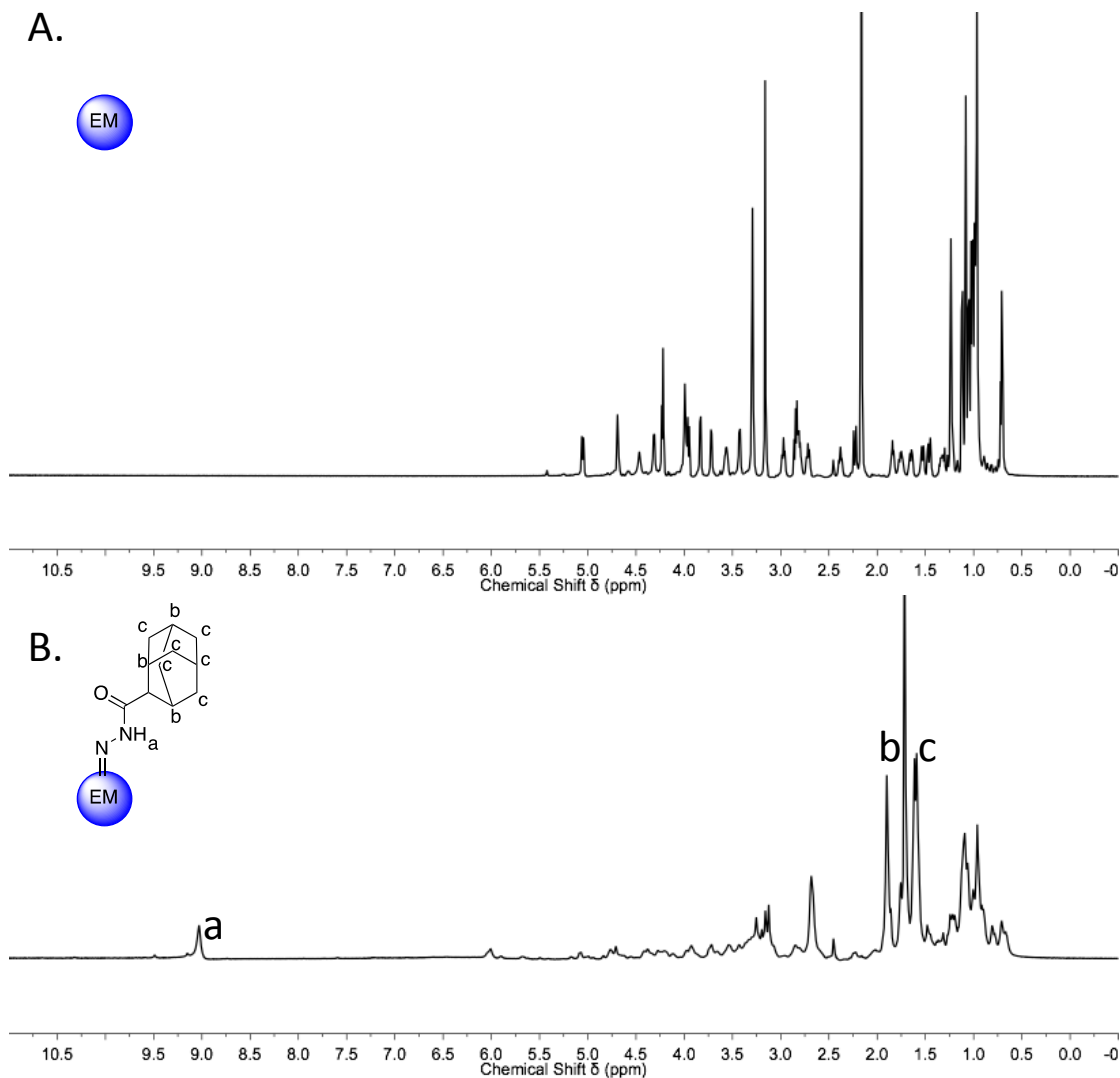

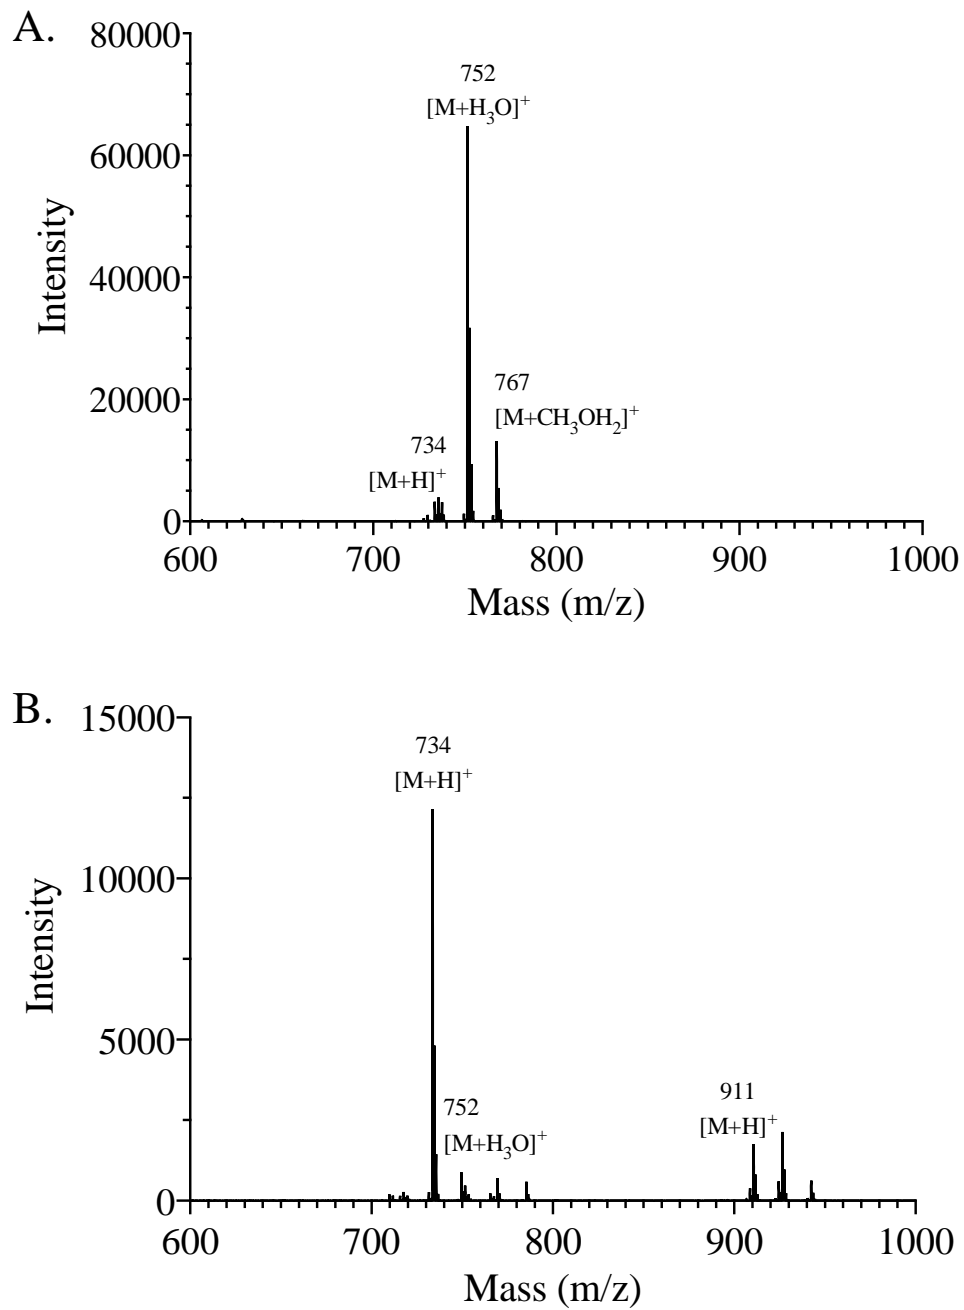

Figure S2. MALDI spectra of (A) EM and (B) AD-EM.

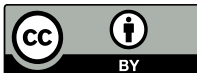

© 2017 by the authors; licensee MDPI, Basel, Switzerland. This article is an open access article distributed under the terms and conditions of the Creative Commons by Attribution (CC-BY) license (<http://creativecommons.org/licenses/by/4.0/>).
